# Supplementary figures and images for: The Maze Pathway of Coevolution: A Critical Review over the Leishmania and Its Endosymbiotic History
Source: MDPI journal article supplement (doi:10.3390/genes12050657), 2021-04-27

# Grow of pure and mixed cultures

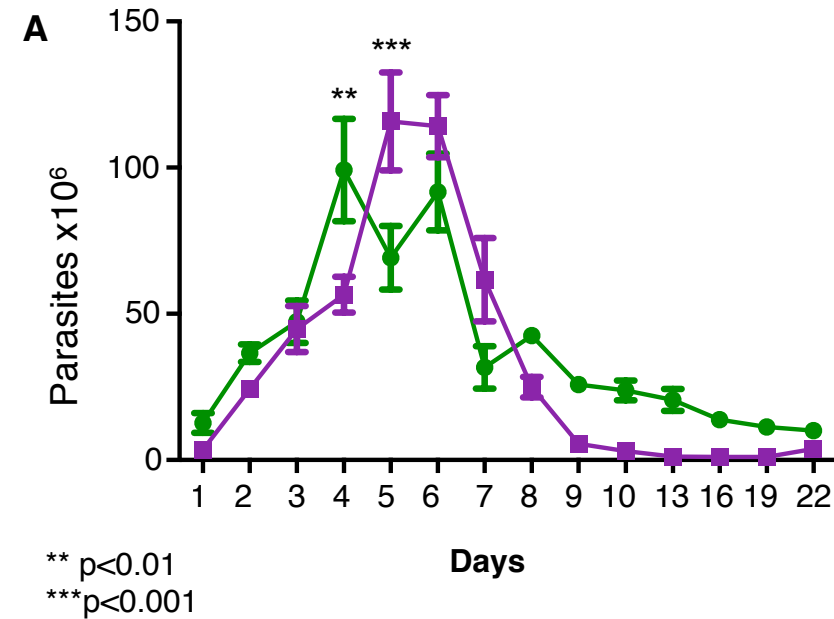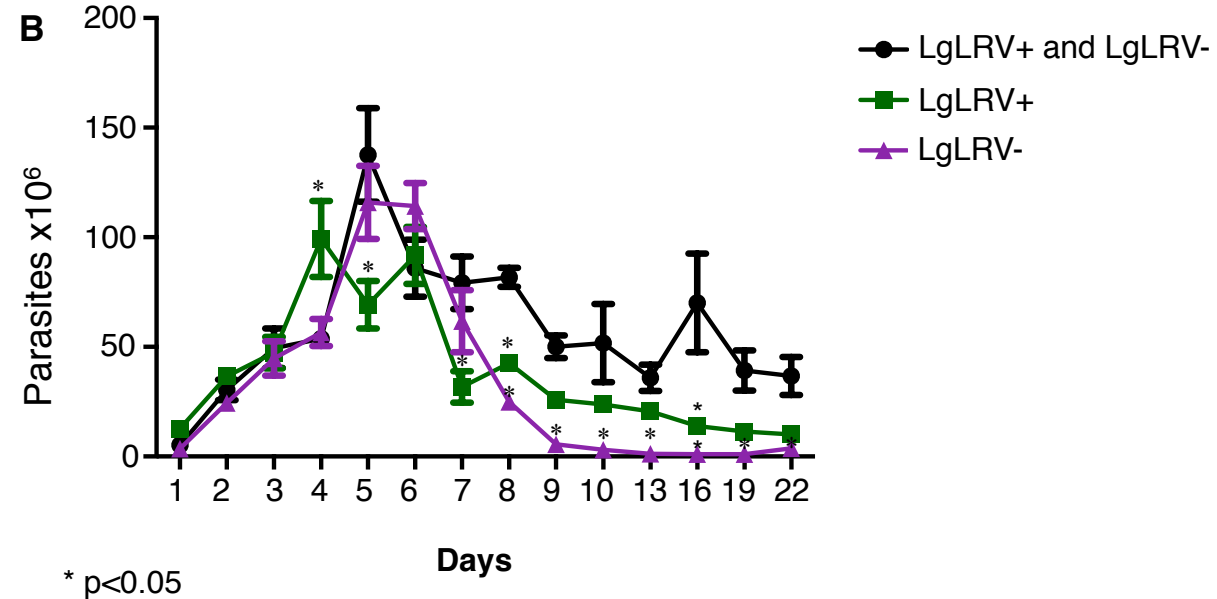

Supplement: s1 [file s1]
